## THE RENAL ELECTROGENIC $\text{Na}^+:\text{HCO}_3^-$ COTRANSPORTER

WALTER F. BORON<sup>1,\*</sup>, MATTHIAS A. HEDIGER<sup>2</sup>, EMILE L. BOULPAEP<sup>1</sup> AND MICHAEL F. ROMERO<sup>1</sup>

<sup>1</sup>Department of Cellular and Molecular Physiology, Yale University School of Medicine, New Haven, CT 06520, USA and <sup>2</sup>Renal Division, Brigham and Women's Hospital, Department of Biological Chemistry and Molecular Pharmacology, Harvard Medical School, Boston, MA 02115, USA

### Summary

The electrogenic  $\text{Na}^+:\text{HCO}_3^-$  cotransporter (symporter) is the major transporter for  $\text{HCO}_3^-$  reabsorption across the basolateral membrane of the renal proximal tubule and also contributes significantly to  $\text{Na}^+$  reabsorption. We expression-cloned the salamander renal electrogenic  $\text{Na}^+:\text{Bicarbonate Cotransporter (NBC)}$  in *Xenopus laevis* oocytes. After injecting poly(A)<sup>+</sup> RNA, fractionated poly(A)<sup>+</sup> RNA or cRNA, we used microelectrodes to monitor membrane potential ( $V_m$ ) and intracellular pH (pHi). All solutions contained ouabain to block the  $\text{Na}^+/\text{K}^+$  pump (P-ATPase). After applying 1.5%  $\text{CO}_2/10\text{ mmol l}^{-1}$   $\text{HCO}_3^-$  (pH 7.5) and allowing pHi to stabilize from the  $\text{CO}_2$ -induced acidification, we removed  $\text{Na}^+$ . In native oocytes or water-injected controls, removing  $\text{Na}^+$  hyperpolarized the cell by  $-5\text{ mV}$  and had no effect on pHi. In oocytes injected with poly(A)<sup>+</sup> RNA, removing  $\text{Na}^+$  transiently depolarized the cell by  $-10\text{ mV}$  and caused pHi to decrease; both effects were blocked by 4,4'-diisothiocyano-2,2'-stilbenedisulfonate (DIDS) and required  $\text{HCO}_3^-$ . We enriched the signal by electrophoretic

fractionation of the poly(A)<sup>+</sup> RNA, and constructed a size-selected cDNA library in pSPORT1 using the optimal fraction. Screening the *Ambystoma* library yielded a single clone (aNBC). Expression was first obvious 3 days after injection of NBC cRNA. Adding  $\text{CO}_2/\text{HCO}_3^-$  induced a large ( $>50\text{ mV}$ ) and rapid hyperpolarization, followed by a partial relaxation as pHi stabilized. Subsequent  $\text{Na}^+$  removal depolarized the cell by more than  $40\text{ mV}$  and decreased pHi. aNBC is a full-length clone with a start Met and a poly(A)<sup>+</sup> tail; it encodes a protein with 1025 amino acids and several putative membrane-spanning domains. aNBC is the first member of a new family of  $\text{Na}^+$ -linked  $\text{HCO}_3^-$  transporters. We used aNBC to screen a rat kidney cDNA library, and identified a full-length cDNA clone (rNBC) that encodes a protein of 1035 amino acids. rNBC is 86% identical to aNBC and can be functionally expressed in oocytes.

Key words: intracellular pH, acid–base balance, kidney, proximal tubule, bicarbonate transport.

### Introduction

#### *HCO<sub>3</sub><sup>-</sup> reabsorption by the kidney*

One of the major functions of the renal proximal tubule is to reclaim  $\text{HCO}_3^-$  that has been filtered in the glomerulus. This reabsorption of  $\text{HCO}_3^-$  from the proximal-tubule lumen to the blood helps to maintain an appropriately high  $[\text{HCO}_3^-]$  in the blood and thus helps to stabilize blood pH. Failure to reabsorb sufficient  $\text{HCO}_3^-$  would lead not only to the loss of  $\text{HCO}_3^-$  in the urine but also to the loss of  $\text{Na}^+$  (which normally accompanies reabsorbed  $\text{HCO}_3^-$ ) and osmotically obligated water. Thus, the consequences of reduced  $\text{Na}^+$  reabsorption would be metabolic acidosis and volume depletion.

As shown in Fig. 1,  $\text{HCO}_3^-$  reabsorption by the proximal tubule is a multistep process. First,  $\text{H}^+$  is secreted into the lumen by  $\text{Na}^+/\text{H}^+$  exchangers (antiporters) and presumably vacuolar-type  $\text{H}^+$  pumps (V-type ATPases). Second, this  $\text{H}^+$  titrates luminal  $\text{HCO}_3^-$  to  $\text{CO}_2$  and  $\text{H}_2\text{O}$ , a process accelerated by carbonic anhydrase IV (CA IV), which is tethered to the extracellular surface of the apical membrane. Third, the newly

formed  $\text{CO}_2$  and  $\text{H}_2\text{O}$  enter the proximal-tubule cell. Fourth, cytoplasmic CA II accelerates the regeneration of  $\text{H}^+$  and  $\text{HCO}_3^-$ . Finally, this  $\text{HCO}_3^-$  exits the proximal-tubule cell across the basolateral membrane, completing the movement of  $\text{HCO}_3^-$  from lumen to blood.

In the portion of the proximal tubule furthest downstream from the glomerulus, the S3 segment, the efflux of  $\text{HCO}_3^-$  across the basolateral membrane is mediated by both a  $\text{Cl}^-/\text{HCO}_3^-$  exchanger and an electrogenic  $\text{Na}^+:\text{HCO}_3^-$  cotransporter (Nakhoul *et al.* 1990). However, in more proximal segments of the proximal tubule (S2 and S1 segments), where the bulk of  $\text{HCO}_3^-$  is in fact reabsorbed, the relative contribution of  $\text{Cl}^-/\text{HCO}_3^-$  exchange decreases and that of electrogenic  $\text{Na}^+:\text{HCO}_3^-$  cotransport increases (Kondo and Frömter, 1987). All told, the proximal tubule reabsorbs some 90% of the filtered  $\text{HCO}_3^-$  and 70% of the filtered  $\text{Na}^+$ . The electrogenic  $\text{Na}^+:\text{HCO}_3^-$  cotransporter carries the vast majority of this  $\text{HCO}_3^-$  and approximately 25% of the  $\text{Na}^+$ .

\*e-mail: Boronwf@maspo3.mas.yale.edu.

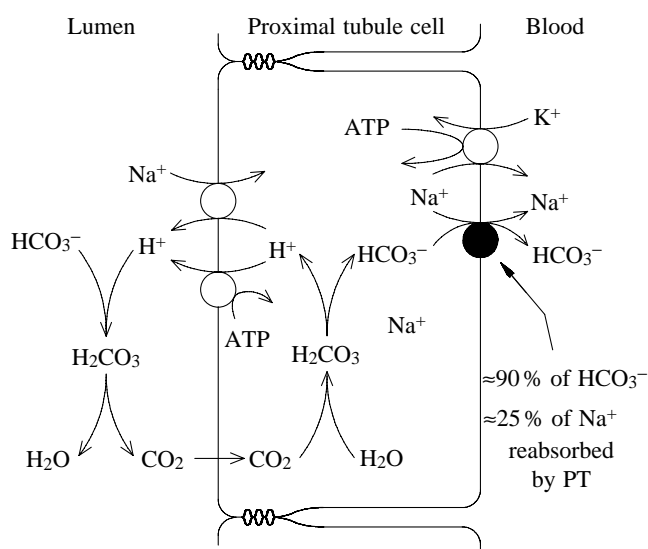

Fig. 1. Model of  $\text{HCO}_3^-$  reabsorption by the mammalian renal proximal tubule (PT). The renal electrogenic  $\text{Na}^+:\text{HCO}_3^-$  cotransporter, which has a  $\text{Na}^+:\text{HCO}_3^-$  stoichiometry of 1:3, is the major route for transferring  $\text{HCO}_3^-$  from the proximal-tubule cell to the blood and is responsible for moving as much as approximately 90% of the  $\text{HCO}_3^-$  transported by the proximal tubule and approximately 80% of the  $\text{HCO}_3^-$  filtered by the glomeruli. The cotransporter is also responsible for moving a substantial amount of  $\text{Na}^+$  from cell to blood, perhaps approximately 15%. As such, the cotransporter functions as an auxiliary  $\text{Na}^+$  pump. The steady-state  $\text{pH}_i$  of proximal-tubule cells in  $\text{CO}_2/\text{HCO}_3^-$  is approximately 7.1–7.5, being more alkaline near the glomerulus. The  $\text{pH}$  of the luminal fluid falls from 7.4 at the glomerulus to approximately 6.6 at the end of the proximal tubule. The membrane voltage across the basolateral membrane is more negative than  $-60\text{mV}$  (Boulpaep, 1976). The lumen is a few millivolts negative with respect to the blood.

#### The electrogenic $\text{Na}^+:\text{HCO}_3^-$ cotransporter

First described by Boron and Boulpaep (1983) in the proximal tubule of the salamander *Ambystoma tigrinum*, electrogenic  $\text{Na}^+:\text{HCO}_3^-$  cotransporters have subsequently been studied in several epithelial cell lines (Jentsch *et al.* 1984, 1985), intact rat and rabbit proximal tubules (Alpern, 1985; Sasaki *et al.* 1987), as well as in a number of other cell types (Deitmer and Schlue, 1989; Gleeson *et al.* 1989; Fitz *et al.* 1989; Weintraub and Machen, 1989; Rajendran *et al.* 1991; M. O. Bevensee and W. F. Boron, in preparation; M. O. Bevensee, M. Apkon and W. F. Boron, in preparation). The four hallmarks of the renal  $\text{Na}^+:\text{HCO}_3^-$  cotransporter are its electrogenicity,  $\text{Na}^+$ -dependence,  $\text{HCO}_3^-$ -dependence and blockade by stilbene derivatives such as DIDS. Probably the most reliable assay for detecting the electrogenic  $\text{Na}^+:\text{HCO}_3^-$  cotransporter in intact cells is to remove extracellular  $\text{Na}^+$ . This maneuver causes an abrupt positive shift (i.e. depolarization) in the cell membrane voltage ( $V_m$ ). In the absence of  $\text{HCO}_3^-$ , in the presence of DIDS or in cells lacking the cotransporter, removing  $\text{Na}^+$  generally causes a small negative shift in  $V_m$ , reflecting the normal  $\text{Na}^+$  conductance of the cell. In the

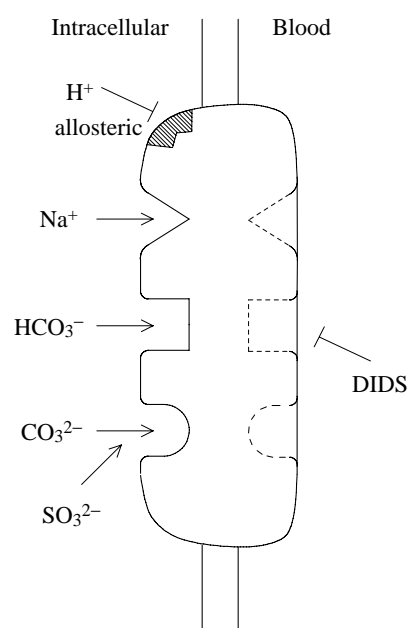

Fig. 2. Model of the renal electrogenic  $\text{Na}^+:\text{HCO}_3^-$  cotransporter, which has a  $\text{Na}^+:\text{HCO}_3^-$  stoichiometry of 1:3. Kinetic evidence (Soleimani and Aronson, 1989) suggests that there are separate binding sites for  $\text{Na}^+$ ,  $\text{HCO}_3^-$  and  $\text{CO}_3^{2-}$ , with  $\text{SO}_3^{2-}$  substituting for  $\text{CO}_3^{2-}$  at the  $\text{CO}_3^{2-}$  site.  $\text{H}^+$  is an allosteric inhibitor of  $\text{Na}^+$  binding. DIDS inhibits the activity of the cotransporter.

presence of a functional electrogenic  $\text{Na}^+:\text{HCO}_3^-$  cotransporter,  $\text{Na}^+$  removal also causes a slower fall in intracellular  $\text{pH}$  ( $\text{pH}_i$ ) as well as a DIDS-sensitive fall in  $[\text{Na}^+]_i$ .

The electrogenicity of the cotransporter implies that each  $\text{Na}^+$  moves with two or more  $\text{HCO}_3^-$  or  $\text{HCO}_3^-$  equivalents (e.g.  $\text{CO}_3^{2-}$ ). The  $\text{Na}^+:\text{HCO}_3^-$  stoichiometry has not been directly measured. However, it has been deduced by Soleimani *et al.* (1987) on the basis of thermodynamic data obtained from membrane vesicles prepared from the basolateral membranes of rabbit proximal tubules. The principle underlying these experiments is that the net direction of cotransport depends on the stoichiometry as well as on the  $\text{Na}^+$  and  $\text{HCO}_3^-$  electrochemical gradients. Varying these gradients while measuring the net direction of transport, the authors concluded that the renal electrogenic  $\text{Na}^+:\text{HCO}_3^-$  cotransporter has a  $\text{Na}^+:\text{HCO}_3^-$  stoichiometry of 1:3. Further work (Soleimani and Aronson, 1989) was consistent with the hypothesis that the renal electrogenic  $\text{Na}^+:\text{HCO}_3^-$  cotransporter has binding sites for 1  $\text{Na}^+$ , 1  $\text{HCO}_3^-$  and 1  $\text{CO}_3^{2-}$ , and that sulphite ( $\text{SO}_3^{2-}$ ) can replace  $\text{CO}_3^{2-}$  at the  $\text{CO}_3^{2-}$  site (Fig. 2).

#### The physiological family of $\text{HCO}_3^-$ transporters

The  $\text{HCO}_3^-$  transporters shown in Fig. 3 might be thought of as a functional family of transporters that may or may not be related molecularly. The renal electrogenic  $\text{Na}^+:\text{HCO}_3^-$  cotransporter, with a  $\text{Na}^+:\text{HCO}_3^-$  stoichiometry of 1:3, is one of as many as four  $\text{Na}^+$ -coupled  $\text{HCO}_3^-$  transporters, as well as a  $\text{Cl}^-/\text{HCO}_3^-$  exchanger and a  $\text{K}^+:\text{HCO}_3^-$

| Name                                                         | $\Delta\text{pHi}$ | Process                                                                             |
|--------------------------------------------------------------|--------------------|-------------------------------------------------------------------------------------|
| $\text{Cl}^-/\text{HCO}_3^-$ exchanger                       | ↓                  | 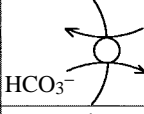   |
| $\text{Na}^+$ -driven $\text{Cl}^-/\text{HCO}_3^-$ exchanger | ↑                  |    |
| 1:3 $\text{Na}^+:\text{HCO}_3^-$ cotransporter               | ↓                  |    |
| 1:2 $\text{Na}^+:\text{HCO}_3^-$ cotransporter               | ↑                  |    |
| 1:1 $\text{Na}^+:\text{HCO}_3^-$ cotransporter               | ↑                  |    |
| $\text{K}^+:\text{HCO}_3^-$ cotransporter                    | ↓                  |  |

Fig. 3. Major  $\text{HCO}_3^-$  transporters in animal cells. Three of these transporters normally cause  $\text{pHi}$  to decrease: the  $\text{Cl}^-/\text{HCO}_3^-$  exchanger, the 1:3 electrogenic  $\text{Na}^+:\text{HCO}_3^-$  cotransporter and the  $\text{K}^+:\text{HCO}_3^-$  cotransporter. Three others normally cause  $\text{pHi}$  to increase: the  $\text{Na}^+$ -driven  $\text{Cl}^-/\text{HCO}_3^-$  exchanger, the 1:2 electrogenic  $\text{Na}^+:\text{HCO}_3^-$  cotransporter and the 1:1 electroneutral  $\text{Na}^+:\text{HCO}_3^-$  cotransporter.

cotransporter. There is at least one, and perhaps two, other  $\text{Na}^+:\text{HCO}_3^-$  cotransporter that normally mediates a net influx, rather than a net efflux, of  $\text{HCO}_3^-$  equivalents (see Boron and Boulpaep, 1989). That is, they are acid extruders rather than acid loaders. In invertebrate glial cells (Deitmer and Schlue, 1989), mammalian astrocytes (M. O. Bevensee and W. F. Boron, in preparation; M. O. Bevensee, M. Apkon and W. F. Boron, in preparation) and other cells, an electrogenic  $\text{Na}^+:\text{HCO}_3^-$  cotransporter mediates a net influx of  $\text{Na}^+$  and  $\text{HCO}_3^-$ . On the basis of analyses of electrochemical gradients of  $\text{Na}^+$  and  $\text{HCO}_3^-$ , it is believed that such acid-extruding electrogenic  $\text{Na}^+:\text{HCO}_3^-$  cotransporters have a 1:2 stoichiometry. Thus, it is the stoichiometry of the cotransporter, as well as the electrochemical gradients of the transported ions, that determines the net direction of transport and whether the cotransporter behaves as an acid loader (as is generally the case with a 1:3 stoichiometry) or as an acid extruder (as is generally the case with a 1:2 stoichiometry). In addition to cotransporters with stoichiometries of 1:3 and 1:2, work by Vaughan-Jones and colleagues (Dart and Vaughan-Jones, 1992) on heart cells suggests that these cells have an

electroneutral  $\text{Na}^+:\text{HCO}_3^-$  cotransporter with a  $\text{Na}^+:\text{HCO}_3^-$  stoichiometry of 1:1. Camilion de Hurtado *et al.* (1995), however, concluded that this cotransporter is an electrogenic 1:2  $\text{Na}^+:\text{HCO}_3^-$  cotransporter.

The  $\text{Na}^+$ -driven  $\text{Cl}^-/\text{HCO}_3^-$  exchanger is the major acid extruder in a wide variety of animal cells. In contrast to the two electrogenic  $\text{Na}^+:\text{HCO}_3^-$  cotransporters, the  $\text{Na}^+$ -driven  $\text{Cl}^-/\text{HCO}_3^-$  exchanger is electroneutral and has an absolute requirement for  $\text{Cl}^-$ . Like the 1:2 and 1:1  $\text{Na}^+:\text{HCO}_3^-$  cotransporters, the  $\text{Na}^+$ -driven  $\text{Cl}^-/\text{HCO}_3^-$  exchanger normally moves  $\text{HCO}_3^-$  into cells. Aside from the work described here on the cloning of the 1:3 electrogenic  $\text{Na}^+:\text{HCO}_3^-$  cotransporter, there is no published molecular information on any of the  $\text{Na}^+$ -coupled  $\text{HCO}_3^-$  transporters.

The  $\text{Cl}^-/\text{HCO}_3^-$  exchanger, sometimes referred to as the  $\text{Na}^+$ -independent  $\text{Cl}^-/\text{HCO}_3^-$  exchanger to distinguish it from the  $\text{Na}^+$ -driven  $\text{Cl}^-/\text{HCO}_3^-$  exchanger, was the first  $\text{HCO}_3^-$  transporter to be described. There is now considerable information on the molecular biology and biochemistry of  $\text{Cl}^-/\text{HCO}_3^-$  exchangers. The first of these to be cloned was the band 3 protein of red blood cells, also known as AE-1 (for Anion Exchanger) (Kopito and Lodish, 1985). AE-1 plays a major role in  $\text{CO}_2$  carriage by erythrocytes. Two related  $\text{Cl}^-/\text{HCO}_3^-$  exchangers, AE-2 and AE-3, are present in a wide variety of non-erythroid cells. Because they normally mediate the exchange of extracellular  $\text{Cl}^-$  for intracellular  $\text{HCO}_3^-$ , AE-2 and AE-3 function as intracellular acid loaders.

#### Approach for cloning the renal electrogenic $\text{Na}^+:\text{HCO}_3^-$ cotransporter

There are no molecular tools available for uniquely identifying any of the cation-coupled  $\text{HCO}_3^-$  transporters. By forming covalent derivatives with its targets, the stilbene derivative DIDS usually blocks all of the cation-coupled  $\text{HCO}_3^-$  transporters other than the  $\text{K}^+:\text{HCO}_3^-$  cotransporter. DIDS also inhibits a host of other transporters, channels and proteins. It is clear that DIDS, as well as the related compound 4-acetamido-4'-isothiocyano-2,2'-stilbenedisulfonate (SITS), is hardly specific. Therefore, in embarking on our attempt to clone the renal electrogenic  $\text{Na}^+:\text{HCO}_3^-$  cotransporter, we decided on an expression-cloning approach. Others have used *Xenopus laevis* oocytes to expression-clone cDNAs as widely ranging as those that encode the  $\text{Na}^+:\text{glucose}$  cotransporter (Hediger *et al.* 1987), the  $\text{H}^+:\text{oligopeptide}$  cotransporter (Fei *et al.* 1994), the epithelial amiloride-sensitive  $\text{Na}^+$  channel (Canessa *et al.* 1994) and the  $\text{Ca}^{2+}$  receptor from the parathyroid gland (Brown *et al.* 1993).

We isolated poly(A)<sup>+</sup> RNA from either the cortex of rabbit kidneys or whole kidneys of tiger salamanders, and microinjected this RNA into stage 5/6 oocytes from the frog *Xenopus laevis*. After waiting several days, we assayed the oocytes for expression of an electrogenic  $\text{Na}^+:\text{HCO}_3^-$  cotransporter, using the approach schematized in Fig. 4. An oocyte, which is approximately 1.2 mm in diameter, is impaled with both a conventional voltage electrode filled with  $3 \text{ mol l}^{-1}$

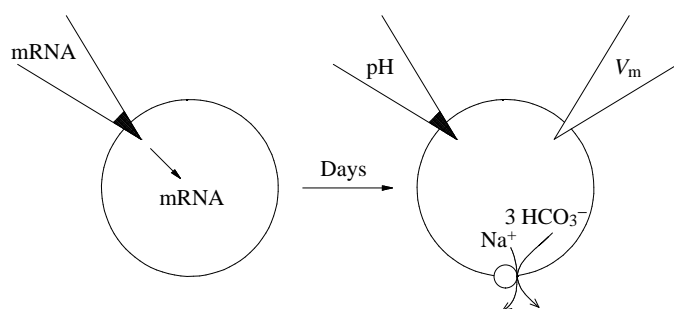

Fig. 4. Injecting RNA and assaying it for activity of an electrogenic  $\text{Na}^+:\text{HCO}_3^-$  cotransporter. First, poly(A)<sup>+</sup> RNA (or cRNA synthesized from NBC cDNA) is microinjected into a *Xenopus laevis* oocyte. After several days, the oocyte is impaled with pH and voltage electrodes in order to monitor the pH<sub>i</sub> and  $V_m$  changes characteristic of the electrogenic  $\text{Na}^+:\text{HCO}_3^-$  cotransporter.

KCl and a pH-sensitive microelectrode filled with a liquid pH sensor.

#### The assay

Perhaps the two most important aspects of an expression-cloning project are to identify a good source of the mRNA that encodes the protein of interest (see below) and to develop a good assay. Our assay was to monitor the  $V_m$  and pH<sub>i</sub> changes caused by removing extracellular  $\text{Na}^+$  in the presence of  $\text{CO}_2/\text{HCO}_3^-$ . In the presence of an active electrogenic  $\text{Na}^+:\text{HCO}_3^-$  cotransporter, this maneuver is expected to cause  $\text{Na}^+$ ,  $\text{HCO}_3^-$  and net negative charge to leave the cell *via* the electrogenic  $\text{Na}^+:\text{HCO}_3^-$  cotransporter and thus to cause a rapid depolarization (i.e. positive shift in  $V_m$ ) and a slower pH<sub>i</sub> decrease. To make the assay more specific, we required that these  $V_m$  and pH<sub>i</sub> changes be blocked by DIDS and be dependent upon the presence of  $\text{CO}_2/\text{HCO}_3^-$ . By itself, the depolarization induced by  $\text{Na}^+$  removal is nearly diagnostic of electrogenic  $\text{Na}^+:\text{HCO}_3^-$  cotransport. Bear in mind that a conventional  $\text{Na}^+$  conductance would produce a hyperpolarization, not the depolarization characteristic of the electrogenic  $\text{Na}^+:\text{HCO}_3^-$  cotransporter. A decrease in electrogenic  $\text{Na}^+$  pumping will also produce a depolarization, albeit a slow one that should be prevented by pretreating the cell with ouabain (Boron and Boulpaep, 1983). Indeed, we conducted all of our screening experiments in the presence of ouabain to eliminate the potential complication coming from the  $\text{Na}^+/\text{K}^+$  pump. A  $\text{Na}^+$ -dependent  $\text{K}^+$  conductance (Kameyama *et al.* 1984) would lead to a depolarization in response to  $\text{Na}^+$  removal, and this effect may have complicated the identification of a 1:2 electrogenic  $\text{Na}^+:\text{HCO}_3^-$  cotransporter in mammalian astrocytes (M. O. Bevensee, M. Apkon and W. F. Boron, unpublished results). However, by requiring that the depolarization induced by  $\text{Na}^+$  removal be blocked both by DIDS and by removing  $\text{CO}_2/\text{HCO}_3^-$ , we should have eliminated potential confusion from  $\text{Na}^+$ -dependent  $\text{K}^+$  conductances or any other known mechanisms. By further requiring that the  $V_m$  changes be accompanied by

$\text{HCO}_3^-$ -dependent and DIDS-sensitive pH<sub>i</sub> changes, we should have made the assay virtually specific for either a 1:3 or 1:2 electrogenic  $\text{Na}^+:\text{HCO}_3^-$  cotransporter.

We emphasize the specificity of the assay because others have attempted to identify electrogenic  $\text{Na}^+:\text{HCO}_3^-$  cotransporters using much less specific physiological criteria. For example, applying DIDS would be expected to cause a depolarization if an electrogenic  $\text{Na}^+:\text{HCO}_3^-$  cotransporter were operating in the inward direction and a hyperpolarization if the cotransporter were operating in the outward direction. However, DIDS is notoriously non-specific; it can inhibit a wide variety of membrane proteins, including certain  $\text{Cl}^-$  channels, that could influence  $V_m$ . Thus, a DIDS-induced  $V_m$  change can hardly be regarded as specific for an electrogenic  $\text{Na}^+:\text{HCO}_3^-$  cotransporter. Another approach that has been used to identify electrogenic  $\text{Na}^+:\text{HCO}_3^-$  cotransporters is to monitor the  $V_m$  changes that occur when a  $\text{CO}_2/\text{HCO}_3^-$  solution is applied. In principle, applying  $\text{CO}_2/\text{HCO}_3^-$  should cause an initial hyperpolarization (due to electrogenic  $\text{Na}^+/\text{HCO}_3^-$  influx) that wanes as  $[\text{HCO}_3^-]_i$  slowly increases, secondary to the influx of  $\text{CO}_2$ . In the new steady state, the predicted  $V_m$  would be either more negative or more positive than the initial  $V_m$ , depending on whether the net direction of transport was inward or outward, respectively. However, the application of  $\text{CO}_2/\text{HCO}_3^-$  can cause non-specific  $V_m$  changes. In the first place,  $\text{CO}_2$  diffuses rapidly across most cell membranes and could cause pH<sub>i</sub> decreases in the bulk cytoplasm, preceded by perhaps even larger pH changes in the unstirred layer on the inner surface of the cell membrane. Because virtually every ion channel and transporter is at least somewhat pH-sensitive, and some exquisitely so, these pH changes are expected to cause  $V_m$  changes. A second mechanism for  $\text{CO}_2$ -induced  $V_m$  changes is the presence of conductance pathways for  $\text{HCO}_3^-$ . A third potential mechanism for  $V_m$  effects is carbamino formation, analogous to the rapid and reversible formation of carbamino hemoglobin, which leads to major conformational changes. Any or all of these  $\text{CO}_2/\text{HCO}_3^-$ -induced effects could lead to  $V_m$  changes, some of which would probably be blocked or masked by the effects of DIDS. For these reasons, we believe that, when working with an undefined system, it is extremely dangerous to employ non-specific assays for electrogenic  $\text{Na}^+:\text{HCO}_3^-$  cotransport, such as simply the application of DIDS and/or  $\text{CO}_2/\text{HCO}_3^-$ .

#### Source of mRNA

Our initial approach was to isolate poly(A)<sup>+</sup> RNA from the renal cortex of rabbits. Unfortunately, the  $V_m$  record in our  $\text{Na}^+$ -removal assay showed no sign of a transient depolarization. Instead, removing extracellular  $\text{Na}^+$  simply caused  $V_m$  to become more negative, rapidly and reversibly. These  $V_m$  changes are characteristic of a classical  $\text{Na}^+$  conductance.

Reasoning that mRNA isolated from another amphibian might express better in *Xenopus* oocytes, our next approach was to isolate poly(A)<sup>+</sup> RNA from the kidneys of the tiger

salamander *Ambystoma tigrinum*. This was the species in which the electrogenic  $\text{Na}^+:\text{HCO}_3^-$  cotransporter was first identified (Boron and Boulpaep, 1983). Indeed, we found that  $\text{Na}^+$  removal led to a rapid, but transient, depolarization and a slow pHi decrease. These effects were blocked by DIDS and did not occur in the nominal absence of  $\text{CO}_2/\text{HCO}_3^-$ . Nor did these effects occur until several days after the injection of the RNA.

### Properties of the cDNA clone, NBC

After screening a cDNA library by expression in *Xenopus* oocytes, we identified a single clone, which we have named NBC (for  $\text{Na}^+:\text{B}$ icarbonate  $\text{C}$ otransporter). It is a full-length clone with a start Met and a poly(A)<sup>+</sup> tail. The deduced amino-acid sequence of the encoded protein is 1025 amino acids long. Hydropathy analysis predicts multiple membrane-spanning domains. Comparing the DNA sequence of NBC with the GenBank data base reveals that NBC has no substantial homology to known proteins and is thus the first in a new family of  $\text{Na}^+$ -coupled  $\text{HCO}_3^-$  transporters.

When cRNA made from the pure NBC clone is injected into *Xenopus* oocytes, the  $V_m$  and pHi changes are those predicted above. However, the magnitudes of the changes are substantially larger than when we injected oocytes with poly(A)<sup>+</sup> RNA.

Using the NBC clone from *Ambystoma*, which we refer to as aNBC, we cloned its homologue from a rat kidney library. The rat clone, which we refer to as rNBC, is 86% identical to aNBC. It encodes a protein with a predicted length of 1035 amino acids.

### Future trends

#### *Cloning of cDNAs encoding other $\text{HCO}_3^-$ transporters*

We predict that the 1:3 and 1:2 electrogenic  $\text{Na}^+:\text{HCO}_3^-$  cotransporters will be sufficiently homologous at the base-pair level for it to be possible to use aNBC or rNBC (which presumably represent 1:3 electrogenic  $\text{Na}^+:\text{HCO}_3^-$  cotransporters) to identify various 1:2 electrogenic  $\text{Na}^+:\text{HCO}_3^-$  cotransporters. If there is a discrete 1:1  $\text{Na}^+:\text{HCO}_3^-$  cotransporter, then aNBC and rNBC may aid in the identification of that cDNA as well. We would expect that each of the major classes of  $\text{Na}^+:\text{HCO}_3^-$  cotransporter (i.e. 1:3, 1:2 and 1:1) would have multiple isoforms, just as the  $\text{Na}^+/\text{H}^+$  exchangers (NHEs) and AEs have multiple isoforms. The other two uncloned  $\text{HCO}_3^-$  transporters, the  $\text{Na}^+$ -driven  $\text{Cl}^-/\text{HCO}_3^-$  exchanger and the  $\text{K}^+:\text{HCO}_3^-$  cotransporter, are more different, physiologically, from the various  $\text{Na}^+:\text{HCO}_3^-$  transporters. In particular, the  $\text{Na}^+$ -driven  $\text{Cl}^-/\text{HCO}_3^-$  exchanger differs from the  $\text{Na}^+:\text{HCO}_3^-$  cotransporter in that it has an absolute requirement for  $\text{Cl}^-$ . The  $\text{K}^+:\text{HCO}_3^-$  cotransporter differs from the  $\text{Na}^+:\text{HCO}_3^-$  cotransporters in that it transports  $\text{K}^+$  rather than  $\text{Na}^+$  and that it is inhibited by quaternary alkyl ammonium ions, such as tetraethylammonium (B. A. Davis, E. M. Hogan, J. Zhao and W. F. Boron, unpublished observations), but is

insensitive to DIDS. Thus, it will be interesting to see whether the NBCs can be used to identify the cDNAs encoding either of these other two  $\text{HCO}_3^-$  transporters.

#### *Structure–function analyses*

As the cDNAs encoding the various  $\text{HCO}_3^-$  transporters become identified, comparing the structures and functions of the wild-type transporters may yield important clues as to which parts of the respective molecules might be important for determining such parameters as  $\text{Na}^+:\text{HCO}_3^-$  stoichiometry and  $\text{Cl}^-$  binding. Truncations, deletions and point mutations to the cDNAs encoding these transporters, as well as chimeras made among their cDNAs, could yield additional insights into structure–function relationships of the  $\text{HCO}_3^-$  transporters. It is intriguing to speculate that, if the 1:3 electrogenic  $\text{Na}^+:\text{HCO}_3^-$  cotransporter has separate binding sites for  $\text{Na}^+$ ,  $\text{CO}_3^{2-}$  and  $\text{HCO}_3^-$ , the 1:2 cotransporter might lack the  $\text{HCO}_3^-$  binding site and the 1:1 cotransporter might lack the  $\text{CO}_3^{2-}$  binding site. Chimera experiments may make it possible to test this hypothesis.

#### *Distribution and localization of the transporters*

As the cDNAs encoding the  $\text{HCO}_3^-$  transporters become available, it will be possible to establish the tissue distribution of their mRNAs. The development of antibodies specific for various  $\text{HCO}_3^-$  transporters and their isoforms may make it possible to determine the tissue distribution of the transporter proteins and to determine their topology. Antibodies suitable for immunocytochemistry could establish the cellular distribution (e.g. apical *versus* basolateral membrane of epithelial cells) of the transporter proteins. Finally, antibodies suitable for immunoprecipitation could permit biochemical analyses of transporter proteins.

In short, the next few years could be an exciting time for those interested in  $\text{HCO}_3^-$  transport, with the promised development of a host of molecular tools making it possible to probe the molecular physiology of  $\text{HCO}_3^-$  transporters to an unprecedented degree.

This work was supported by NIH grants DK30344, NS18400, DK17433 and DK43171. M.F.R. was supported by grants from the National Kidney Foundation and the NIH (NRSA DK09342).

### References

- ALPERN, R. J. (1985). Mechanism of basolateral membrane  $\text{H}^+/\text{OH}^-/\text{HCO}_3^-$  transport in the rat proximal convoluted tubule. A sodium-coupled electrogenic process. *J. gen. Physiol.* **86**, 613–636.
- BORON, W. F. AND BOULPAEP, E. L. (1983). Intracellular pH regulation in the renal proximal tubule of the salamander: basolateral  $\text{HCO}_3^-$  transport. *J. gen. Physiol.* **81**, 53–94.
- BORON, W. F. AND BOULPAEP, E. L. (1989). The electrogenic  $\text{Na}^+:\text{HCO}_3^-$  cotransporter. *Kidney Int.* **36**, 392–402.
- BOULPAEP, E. L. (1976). Electrical phenomena in the nephron. *Kidney Int.* **9**, 88–102.
- BROWN, E. M., GAMBA, G., RICCARDI, D., LOMBARDI, M., BUTTERS,

- R., KIFOR, O., SUN, A., HEDIGER, M. A., LYTTON, J. AND HEBERT, S. C. (1993). Cloning and characterization of an extracellular  $\text{Ca}^{2+}$ -sensing receptor from bovine parathyroid. *Nature* **366**, 575–580.
- CAMILION DE HURTADO, M. C., PEREZ, N. G. AND CINGOLANI, H. E. (1995). An electrogenic sodium–bicarbonate cotransport in the regulation of myocardial intracellular pH. *J. molec. cell. Cardiol.* **27**, 231–242.
- CANESSA, C. M., SCHILD, L., BUELL, G., THORENS, B., GAUTSCHI, I., HORISBERGER, J.-D. AND ROSSIER, B. C. (1994). Amiloride-sensitive epithelial  $\text{Na}^+$  channel is made of three homologous subunits. *Nature* **367**, 463–467.
- DART, C. AND VAUGHAN-JONES, R. D. (1992).  $\text{Na}^+$ – $\text{HCO}_3^-$  symport in the sheep cardiac Purkinje fibre. *J. Physiol., Lond.* **451**, 365–385.
- DEITMER, J. W. AND SCHLUE, W.-R. (1989). An inwardly directed electrogenic sodium–bicarbonate cotransport in leech glial cells. *J. Physiol., Lond.* **411**, 179–194.
- FEI, Y.-J., KANAI, Y., NUSSBERGER, S., GANAPATHY, V., LEIBACH, F. H., ROMERO, M. F., SINGH, S. K., BORON, W. F. AND HEDIGER, M. A. (1994). Expression-cloning of a mammalian proton-coupled oligopeptide transporter. *Nature* **368**, 563–566.
- FITZ, J. G., PERSICO, M. AND SCHARSCHMIDT, B. F. (1989). Electrophysiological evidence for  $\text{Na}^+$ -coupled bicarbonate transport in cultured rat hepatocytes. *Am. J. Physiol.* **256**, G491–G500.
- GLEESON, D., SMITH, N. D. AND BOYER, J. L. (1989). Bicarbonate-dependent and -independent intracellular pH regulatory mechanisms in rat hepatocytes. *J. clin. Invest.* **84**, 312–321.
- HEDIGER, M. A., COADY, M. J., IKEDA, T. S. AND WRIGHT, E. M. (1987). Expression cloning and cDNA sequencing of the  $\text{Na}^+$ /glucose co-transporter. *Nature* **330**, 379–381.
- JENTSCH, T. J., KELLER, S. K., KOCH, M. AND WIEDERHOLT, M. (1984). Evidence for coupled transport of bicarbonate and sodium in cultured bovine corneal endothelial cells. *J. Membr. Biol.* **81**, 189–204.
- JENTSCH, T. J., SCHILL, B. S., SCHWARTZ, P., MATTHES, H., KELLER, S. K. AND WIEDERHOLT, J. (1985). Kidney epithelial cells of monkey origin (BSC-1) express a sodium bicarbonate cotransport. *J. biol. Chem.* **260**, 15554–15560.
- KAMEYAMA, M., KAKEI, M., SATO, R., SHIBASAKI, T., MATSUDA, H. AND IRISAWA, H. (1984). Intracellular  $\text{Na}^+$  activates a  $\text{K}^+$  channel in mammalian cardiac cells. *Nature* **309**, 354–356.
- KONDO, Y. AND FRÖMTER, E. (1987). Axial heterogeneity of sodium–bicarbonate cotransport in proximal straight tubule of rabbit kidney. *Pflügers Arch.* **410**, 481–486.
- KOPITO, R. R. AND LODISH, H. F. (1985). Primary structure and transmembrane orientation of the murine anion exchange protein. *Nature* **316**, 234–238.
- NAKHOUL, N. L., CHEN, L. K. AND BORON, W. F. (1990). Intracellular pH regulation in rabbit S3 proximal tubule: basolateral  $\text{Cl}^-$ – $\text{HCO}_3^-$  exchange and  $\text{Na}^+$ – $\text{HCO}_3^-$  cotransport. *Am. J. Physiol.* **258**, F371–F381.
- RAJENDRAN, V. M., OESTERLIN, M. AND BINDER, H. J. (1991). Sodium uptake across basolateral membrane of rat distal colon. Evidence for  $\text{Na}^+$ – $\text{H}^+$  exchange and  $\text{Na}^+$ –anion cotransport. *J. clin. Invest.* **88**, 1379–1385.
- SASAKI, S., SHIIGAI, T., YOSHIYAMA, N. AND TAKEUCHI, J. (1987). Mechanism of bicarbonate exit across basolateral membrane of rabbit proximal straight tubule. *Am. J. Physiol.* **252**, F11–F18.
- SOLEIMANI, M. AND ARONSON, P. S. (1989). Ionic mechanism of  $\text{Na}^+$ : $\text{HCO}_3^-$  cotransport in renal basolateral membrane vesicles. *J. biol. Chem.* **264**, 18302–18308.
- SOLEIMANI, M., GRASSL, S. M. AND ARONSON, P. S. (1987). Stoichiometry of  $\text{Na}^+$ – $\text{HCO}_3^-$  cotransport in basolateral membrane vesicles isolated from rabbit renal cortex. *J. clin. Invest.* **79**, 1276–1280.
- WEINTRAUB, W. H. AND MACHEN, T. E. (1989). pH regulation in hepatoma cells: roles for  $\text{Na}^+$ – $\text{H}^+$  exchange,  $\text{Cl}^-$ – $\text{HCO}_3^-$  exchange and  $\text{Na}^+$ – $\text{HCO}_3^-$  cotransport. *Am. J. Physiol.* **257**, G317–G327.
